# Supplementary material for: Dynamics of Neutralizing Antibody and T-Cell Responses to SARS-CoV-2 and Variants of Concern after Primary Immunization with CoronaVac and Booster with BNT162b2 or ChAdOx1 in Health Care Workers
Source: MDPI journal article supplement (doi:10.3390/vaccines10050639), 2022-04-19
Supplement: s1 [file s1]

**Table S1.** Comparison of SARS-CoV2 surrogate viral neutralizing antibody (sVNT) (%inhibition) and seroconversion rate of sVNT  $\geq 68\%$  to wild type and VOC by multiplex sVNT in participants who received primary immunization with CoronaVac and booster with ChAdOx1 or BNT 162b2.

|                                   | ChAdOx1 booster  | BNT162b2 booster | P      | ChAdOx1 booster | BNT162b2 booster | P      |
|-----------------------------------|------------------|------------------|--------|-----------------|------------------|--------|
|                                   | Median (IQR)     | Median (IQR)     |        | N (%)           | N%               |        |
| Ancestral                         |                  |                  |        |                 |                  |        |
| Post primary immunization week 4  | 57.5 (46.1-69.4) | 67.3 (56.1-76.6) | 0.07   | 8 (14.6)        | 23 (54.8)        | 0.02   |
| Post primary immunization week 12 | 34 (26-44.9)     | 42.7 (34.1-57.4) | 0.01   | 2 (3.6)         | 3 (7.1)          | 0.44   |
| Post booster week 4               | 96.8 (91.5-98.5) | 99.7 (99.4-99.8) | <0.001 | 52 (96.3)       | 42 (100)         | 0.21   |
| Post booster week 12              | 84.8 (71.9-95)   | 95.6 (92.8-98.8) | <0.001 | 42/52 (80.8)    | 42 (100)         | 0.003  |
| Alpha                             |                  |                  |        |                 |                  |        |
| Post primary immunization week 4  | 49.4 (39.6-64)   | 62.2 (49.1-73)   | 0.03   | 6               | 19 (45.2)        | 0.03   |
| Post primary immunization week 12 | 29.8 (23-39.1)   | 39.8 (29.5-49)   | 0.01   | 1 (1.8)         | 3 (7.1)          | 0.19   |
| Post booster week 4               | 95.4 (87.2-98.2) | 99.6 (99-99.8)   | <0.001 | 93 (96.9)       | 51 (94.4)        | 0.25   |
| Post booster week 12              | 81.1 (64.2-91.5) | 95.2 (90.5-98.4) | <0.001 | 79 (84)         | 37 (71.2)        | <0.001 |
| Beta                              |                  |                  |        |                 |                  |        |
| Post primary immunization week 4  | 38.2 (28.4-46.5) | 48.5 (33.1-58.6) | 0.01   | 0 (0)           | 6 (14.3)         | 0.08   |
| Post primary immunization week 12 | 25.4 (19.4-29.9) | 34.2 (24.6-39.5) | 0.005  | 1 (1.8)         | 1 (2.4)          | 0.85   |
| Post booster week 4               | 86.6 (75-93.2)   | 97.3 (95.7-98.1) | <0.001 | 43 (79.6)       | 42 (100)         | 0.002  |
| Post booster week 12              | 64.9 (41.1-78.4) | 88.3 (82.5-93.7) | <0.001 | 22 (42.3)       | 39 (92.9)        | <0.001 |
| Delta                             |                  |                  |        |                 |                  |        |
| Post primary immunization week 4  | 54.2 (43.1-63.5) | 60.2 (50.8-69.1) | 0.07   | 3 (10.3)        | 13 (31)          | 0.05   |

|                                   |                  |                  |        |           |           |        |
|-----------------------------------|------------------|------------------|--------|-----------|-----------|--------|
| Post primary immunization week 12 | 33.7 (24.7-42.2) | 44.9 (33.2-52.7) | 0.003  | 1 (1.8)   | 2 (4.8)   | 0.58   |
| Post booster week 4               | 94.6 (85.5-98.3) | 99.4 (98.9-99.6) | <0.001 | 52 (96.3) | 42 (100)  | 0.50   |
| Post booster week 12              | 77.9 (64.5-91)   | 94 (88.7-97.7)   | <0.001 | 35 (67.3) | 41 (97.6) | <0.001 |
| Gamma                             |                  |                  |        |           |           |        |
| Post primary immunization week 4  | 42.9 (35.7-54.5) | 54.9 (39.1-62.4) | 0.02   | 1 (3.5)   | 8 (19.1)  | 0.07   |
| Post primary immunization week 12 | 26.9 (22.2-32.9) | 36.1 (27-43.3)   | 0.001  | 1 (1.8)   | 2 (4.8)   | 0.58   |
| Post booster week 4               | 87.7 (76.1-95)   | 97.9 (96.3-98.7) | <0.001 | 47 (87)   | 42 (100)  | 0.02   |
| Post booster week 12              | 68.3 (45.8-79.5) | 89.9 (84.7-94.7) | <0.001 | 26 (50)   | 39 (92.9) | <0.001 |
| Omicron                           |                  |                  |        |           |           |        |
| Post primary immunization week 4  | 21.6 (9.1-32.4)  | 24.1 (12.5-32.2) | 0.72   | 0         | 0         | NA     |
| Post primary immunization week 12 | 24.6 (19.6-35.2) | 31.5 (22-38.6)   | 0.03   | 0         | 0         | NA     |
| Post booster week 4               | 61.2 (44.3-71.3) | 86.3 (73.8-93.6) | <0.001 | 19 (35.2) | 35 (83.3) | <0.001 |
| Post booster week 12              | 26.6 (12.4-37.7) | 50.7 (34.6-71.9) | <0.001 | 3 (5.8)   | 12 (28.6) | 0.004  |

**Table S2.** Comparison of T cell response by ELISpot to Pool S1 and S2 in participants who received primary immunization with CoronaVac and booster with ChAdOx1 or BNT 162b2.

|                                   | ChAdOx1 booster<br>N=10<br>Median (IQR) | BNT162b2 booster<br>N=10<br>Median (IQR) | P-value |
|-----------------------------------|-----------------------------------------|------------------------------------------|---------|
| Pool S1                           |                                         |                                          |         |
| Pre immunization                  | 6 (0-32)                                | 16 (8-32)                                | 0.42    |
| Post primary immunization week 4  | 74 (44-140)                             | 82 (44-152)                              | 0.73    |
| Post primary immunization week 12 | 40 (24-88)                              | 28 (24-44)                               | 0.54    |
| Post booster week 4               | 106 (24-256)                            | 162 (46-228)                             | 0.65    |
| Post booster week 12              | 52 (14-152)                             | 148 (40-264)                             | 0.25    |
| Pool S2                           |                                         |                                          |         |
| Pre immunization                  | 8 (0-24)                                | 14 (4-20)                                | 0.51    |
| Post primary immunization week 4  | 70 (44-188)                             | 84 (40-128)                              | 0.94    |
| Post primary immunization week 12 | 56 (16-104)                             | 56 (32-64)                               | 0.77    |
| Post booster week 4               | 94 (52-184)                             | 146 (56-290)                             | 0.45    |
| Post booster week 12              | 58 (24-158)                             | 104 (28-140)                             | 0.82    |



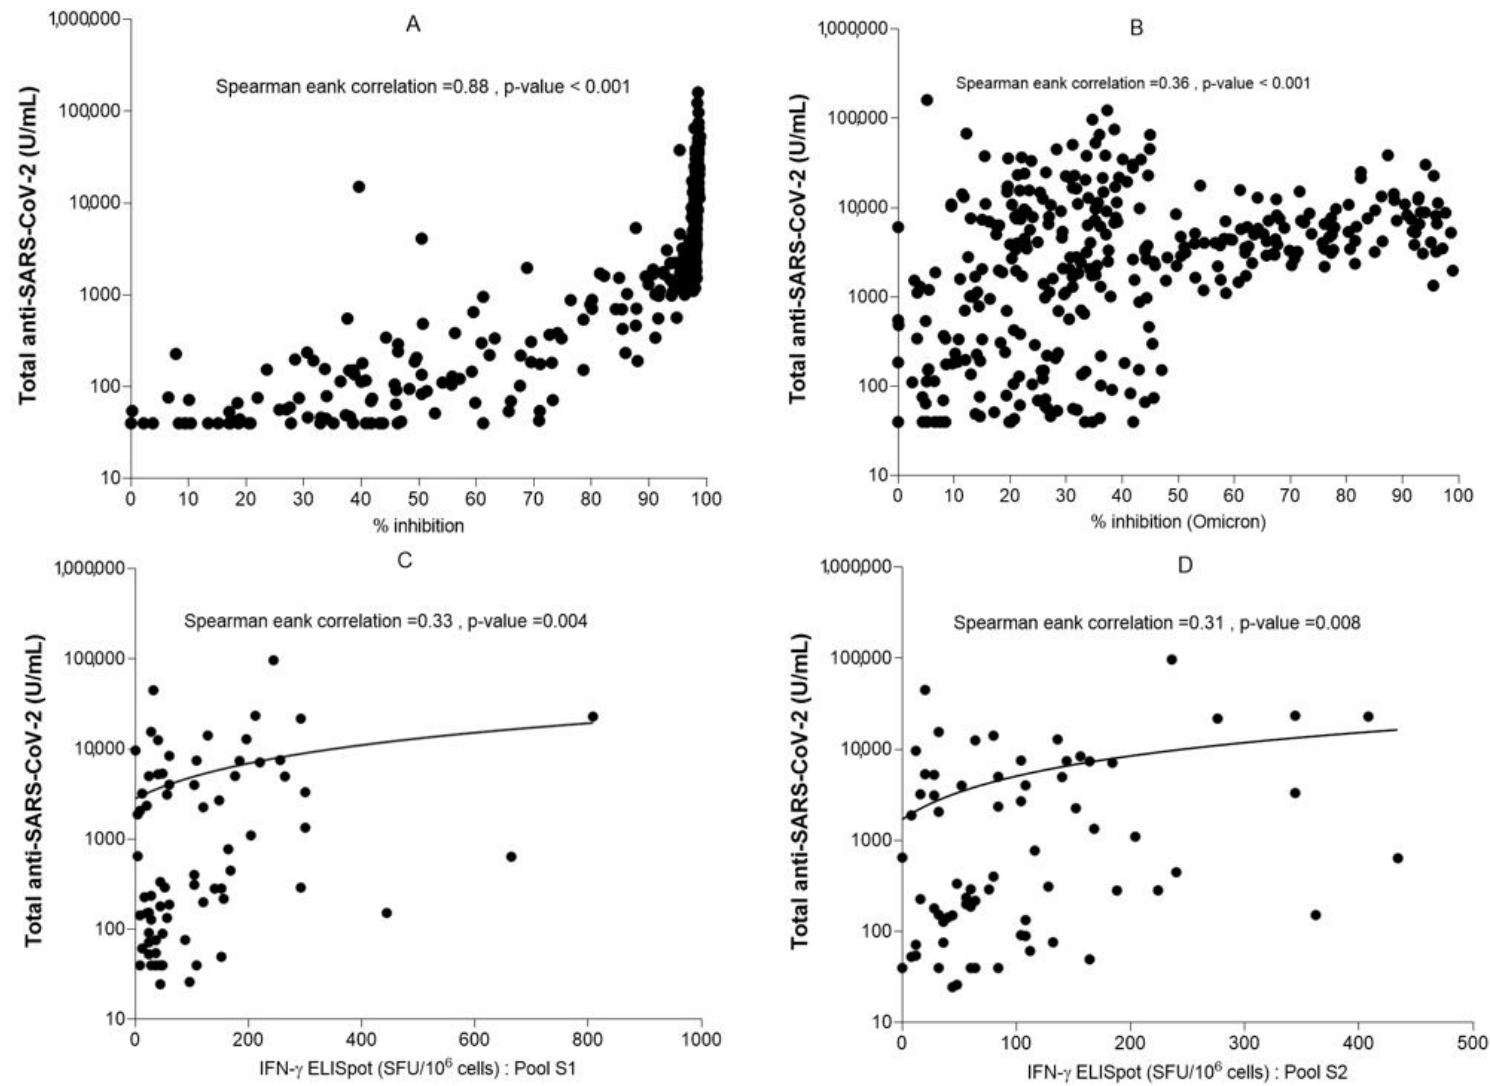

**Figure S1.** Correlation between total anti-SARS-CoV-2 and other immune response including (A) sVNT to ancestral type (B) sVNT to Omicron (C) the ELISpot of Pool S1 and (D) the ELISpot of S2.
